# Supplementary material for: A promising growth promoting Meyerozyma caribbica from Solanum xanthocarpum alleviated stress in maize plants
Source: Oxford University Press journal article supplement (doi:10.1042/bsr20190290), 2019-10-01
Supplement: bsr-2019-0290_supp.pdf [file bsr-2019-0290_supp.pdf]

# A promising growth promoting *Meyerozyma caribbica* from *Solanum xanthocarpum* alleviated stress in maize plants

## Supplementary data

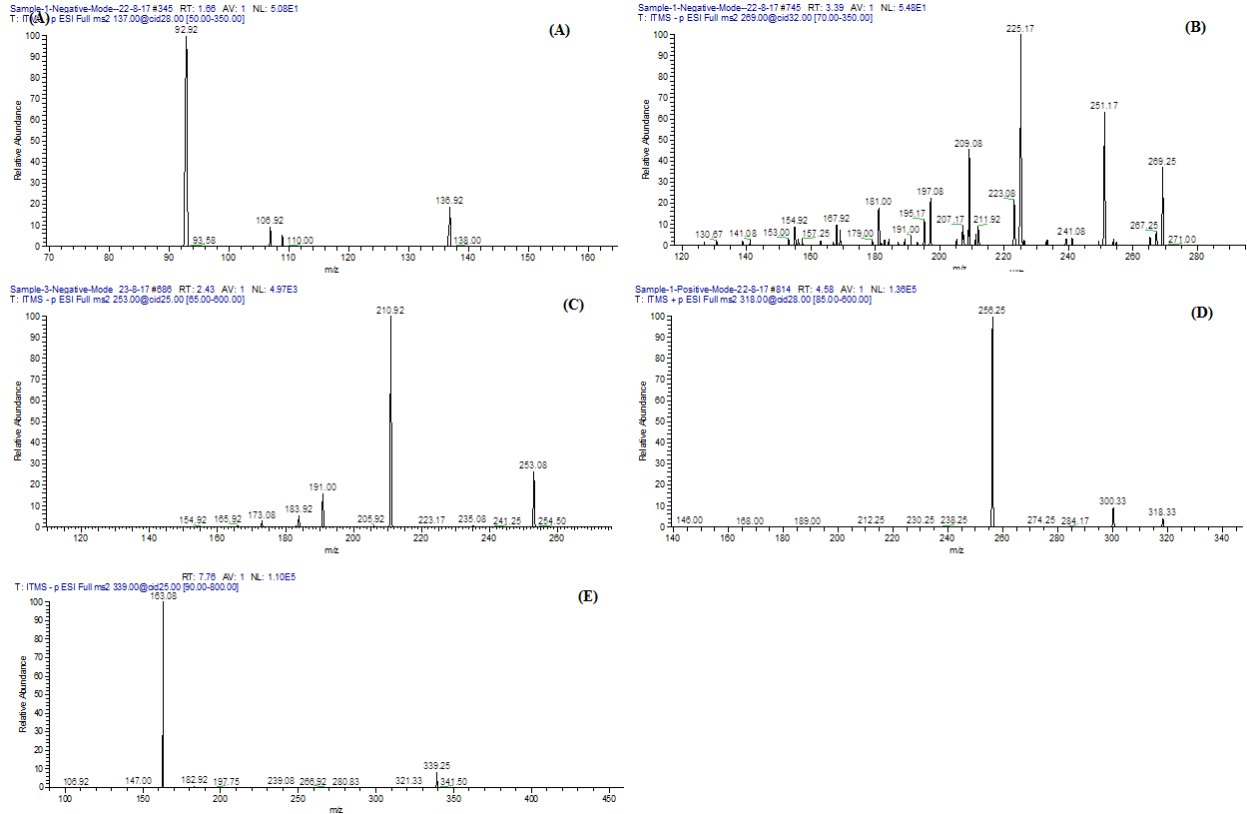

**Figure S1:** LC MS/MS chromatograms of SXSp1 culture filtrate.

Figure 4A represents LCMS/MS of p-hydroxybenzoic acid; Figure 4B represents LCMS/MS of genistin; Figure 4C represents LCMS/MS of diadzein; Figure 4D represents LCMS/MS of quercetin; Figure 4E represents LCMS/MS of caffeoyl-D-glucose.

**Correlations**

|            |                     | Chla    | Chlb    | Carotenoid | EL      | RWC     | PFW     | PDW     | SL      | RL      | IAA     | ABA     | Proline | POD     | CAT     | Phenol  | Flavonoids |
|------------|---------------------|---------|---------|------------|---------|---------|---------|---------|---------|---------|---------|---------|---------|---------|---------|---------|------------|
| Chla       | Pearson Correlation | 1       | .975**  | .711**     | -.654** | .787**  | .819**  | .882**  | .921**  | .414*   | .704**  | -.799** | -.475*  | -.715** | -.738** | .801**  | .632**     |
|            | Sig. (2-tailed)     |         | .000    | .000       | .001    | .000    | .000    | .000    | .000    | .044    | .000    | .000    | .019    | .000    | .000    | .000    | .001       |
|            | N                   | 24      | 24      | 24         | 24      | 24      | 24      | 24      | 24      | 24      | 24      | 24      | 24      | 24      | 24      | 24      | 24         |
| Chlb       | Pearson Correlation | .975**  | 1       | .659**     | -.587** | .761**  | .815**  | .879**  | .954**  | .364    | .659**  | -.763** | -.517** | -.748** | -.758** | .740**  | .559**     |
|            | Sig. (2-tailed)     | .000    |         | .000       | .003    | .000    | .000    | .000    | .000    | .080    | .000    | .000    | .010    | .000    | .000    | .000    | .005       |
|            | N                   | 24      | 24      | 24         | 24      | 24      | 24      | 24      | 24      | 24      | 24      | 24      | 24      | 24      | 24      | 24      | 24         |
| Carotenoid | Pearson Correlation | .711**  | .659**  | 1          | -.802** | .848**  | .804**  | .876**  | .742**  | .791**  | .938**  | -.492*  | .187    | -.137   | -.180   | .916**  | .915**     |
|            | Sig. (2-tailed)     | .000    | .000    |            | .000    | .000    | .000    | .000    | .000    | .000    | .000    | .015    | .382    | .524    | .401    | .000    | .000       |
|            | N                   | 24      | 24      | 24         | 24      | 24      | 24      | 24      | 24      | 24      | 24      | 24      | 24      | 24      | 24      | 24      | 24         |
| EL         | Pearson Correlation | -.654** | -.587** | -.802**    | 1       | -.643** | -.544** | -.802** | -.538** | -.728** | -.892** | .759**  | -.119   | .302    | .338    | -.897** | -.893**    |
|            | Sig. (2-tailed)     | .001    | .003    | .000       |         | .001    | .006    | .000    | .007    | .000    | .000    | .000    | .578    | .152    | .106    | .000    | .000       |
|            | N                   | 24      | 24      | 24         | 24      | 24      | 24      | 24      | 24      | 24      | 24      | 24      | 24      | 24      | 24      | 24      | 24         |
| RWC        | Pearson Correlation | .787**  | .761**  | .848**     | -.643** | 1       | .809**  | .881**  | .875**  | .815**  | .884**  | -.452*  | .107    | -.243   | -.237   | .906**  | .854**     |
|            | Sig. (2-tailed)     | .000    | .000    | .000       | .001    |         | .000    | .000    | .000    | .000    | .000    | .026    | .619    | .253    | .265    | .000    | .000       |
|            | N                   | 24      | 24      | 24         | 24      | 24      | 24      | 24      | 24      | 24      | 24      | 24      | 24      | 24      | 24      | 24      | 24         |
| PFW        | Pearson Correlation | .819**  | .815**  | .804**     | -.544** | .809**  | 1       | .850**  | .881**  | .475*   | .734**  | -.490*  | -.142   | -.257   | -.308   | .725**  | .656**     |
|            | Sig. (2-tailed)     | .000    | .000    | .000       | .006    | .000    |         | .000    | .000    | .019    | .000    | .015    | .509    | .225    | .143    | .000    | .001       |
|            | N                   | 24      | 24      | 24         | 24      | 24      | 24      | 24      | 24      | 24      | 24      | 24      | 24      | 24      | 24      | 24      | 24         |
| PDW        | Pearson Correlation | .882**  | .879**  | .876**     | -.802** | .881**  | .850**  | 1       | .914**  | .710**  | .918**  | -.734** | -.103   | -.452*  | -.459*  | .913**  | .853**     |
|            | Sig. (2-tailed)     | .000    | .000    | .000       | .000    | .000    | .000    |         | .000    | .000    | .000    | .000    | .632    | .026    | .024    | .000    | .000       |
|            | N                   | 24      | 24      | 24         | 24      | 24      | 24      | 24      | 24      | 24      | 24      | 24      | 24      | 24      | 24      | 24      | 24         |
| SL         | Pearson Correlation | .921**  | .954**  | .742**     | -.538** | .875**  | .881**  | .914**  | 1       | .507*   | .736**  | -.598** | -.319   | -.560** | -.564** | .775**  | .637**     |
|            | Sig. (2-tailed)     | .000    | .000    | .000       | .007    | .000    | .000    | .000    |         | .011    | .000    | .002    | .128    | .004    | .004    | .000    | .001       |
|            | N                   | 24      | 24      | 24         | 24      | 24      | 24      | 24      | 24      | 24      | 24      | 24      | 24      | 24      | 24      | 24      | 24         |
| RL         | Pearson Correlation | .414*   | .364    | .791**     | -.728** | .815**  | .475*   | .710**  | .507*   | 1       | .898**  | -.318   | .563**  | .108    | .142    | .841**  | .933**     |
|            | Sig. (2-tailed)     | .044    | .080    | .000       | .000    | .000    | .019    | .000    | .011    |         | .000    | .130    | .004    | .616    | .509    | .000    | .000       |
|            | N                   | 24      | 24      | 24         | 24      | 24      | 24      | 24      | 24      | 24      | 24      | 24      | 24      | 24      | 24      | 24      | 24         |
| IAA        | Pearson Correlation | .704**  | .659**  | .938**     | -.892** | .884**  | .734**  | .918**  | .736**  | .898**  | 1       | -.581** | .252    | -.165   | -.185   | .971**  | .985**     |
|            | Sig. (2-tailed)     | .000    | .000    | .000       | .000    | .000    | .000    | .000    | .000    | .000    |         | .003    | .234    | .441    | .388    | .000    | .000       |
|            | N                   | 24      | 24      | 24         | 24      | 24      | 24      | 24      | 24      | 24      | 24      | 24      | 24      | 24      | 24      | 24      | 24         |
| ABA        | Pearson Correlation | -.799** | -.763** | -.492*     | .759**  | -.452*  | -.490*  | -.734** | -.598** | -.318   | -.581** | 1       | .465*   | .752**  | .739**  | -.649** | -.546**    |
|            | Sig. (2-tailed)     | .000    | .000    | .015       | .000    | .026    | .015    | .000    | .002    | .130    | .003    |         | .022    | .000    | .000    | .001    | .006       |
|            | N                   | 24      | 24      | 24         | 24      | 24      | 24      | 24      | 24      | 24      | 24      | 24      | 24      | 24      | 24      | 24      | 24         |
| Proline    | Pearson Correlation | -.475*  | -.517** | .187       | -.119   | .107    | -.142   | -.103   | -.319   | .563**  | .252    | .465*   | 1       | .850**  | .864**  | .107    | .348       |
|            | Sig. (2-tailed)     | .019    | .010    | .382       | .578    | .619    | .509    | .632    | .128    | .004    | .234    | .022    |         | .000    | .000    | .619    | .096       |
|            | N                   | 24      | 24      | 24         | 24      | 24      | 24      | 24      | 24      | 24      | 24      | 24      | 24      | 24      | 24      | 24      | 24         |
| POD        | Pearson Correlation | -.715** | -.748** | -.137      | .302    | -.243   | -.257   | -.452*  | -.560** | .108    | -.165   | .752**  | .850**  | 1       | .980**  | -.318   | -.080      |
|            | Sig. (2-tailed)     | .000    | .000    | .524       | .152    | .253    | .225    | .026    | .004    | .616    | .441    | .000    | .000    |         | .000    | .130    | .711       |
|            | N                   | 24      | 24      | 24         | 24      | 24      | 24      | 24      | 24      | 24      | 24      | 24      | 24      | 24      | 24      | 24      | 24         |
| CAT        | Pearson Correlation | -.738** | -.758** | -.180      | .338    | -.237   | -.308   | -.459*  | -.564** | .142    | -.185   | .739**  | .864**  | .980**  | 1       | -.343   | -.093      |

|            |                     |        |        |        |         |        |        |        |        |        |        |         |      |       |       |        |        |
|------------|---------------------|--------|--------|--------|---------|--------|--------|--------|--------|--------|--------|---------|------|-------|-------|--------|--------|
|            | Sig. (2-tailed)     | .000   | .000   | .401   | .106    | .265   | .143   | .024   | .004   | .509   | .388   | .000    | .000 | .000  |       | .101   | .665   |
|            | N                   | 24     | 24     | 24     | 24      | 24     | 24     | 24     | 24     | 24     | 24     | 24      | 24   | 24    | 24    | 24     | 24     |
|            | Pearson Correlation | .801** | .740** | .916** | -.897** | .906** | .725** | .913** | .775** | .841** | .971** | -.649** | .107 | -.318 | -.343 | 1      | .957** |
| Phenol     | Sig. (2-tailed)     | .000   | .000   | .000   | .000    | .000   | .000   | .000   | .000   | .000   | .000   | .001    | .619 | .130  | .101  |        | .000   |
|            | N                   | 24     | 24     | 24     | 24      | 24     | 24     | 24     | 24     | 24     | 24     | 24      | 24   | 24    | 24    | 24     | 24     |
|            | Pearson Correlation | .632** | .559** | .915** | -.893** | .854** | .656** | .853** | .637** | .933** | .985** | -.546** | .348 | -.080 | -.093 | .957** | 1      |
| Flavonoids | Sig. (2-tailed)     | .001   | .005   | .000   | .000    | .000   | .001   | .000   | .001   | .000   | .000   | .006    | .096 | .711  | .665  | .000   |        |
|            | N                   | 24     | 24     | 24     | 24      | 24     | 24     | 24     | 24     | 24     | 24     | 24      | 24   | 24    | 24    | 24     | 24     |

\*\* . Correlation is significant at the 0.01 level (2-tailed).

\* . Correlation is significant at the 0.05 level (2-tailed).
